# Supplementary material for: A National County-Level Assessment of U.S. Nursing Facility Characteristics Associated with Long-Term Exposure to Traffic Pollution in Older Adults
Source: MDPI journal article supplement (doi:10.3390/ijerph15030487), 2018-03-10
Supplement: s1 [file s1]

## **Details of facility-level care quality measures**

### **Methods**

The care-quality measures included overall quality rating (5 highest, 1 lowest) derived from rating of three domains, including individual quality rating for health inspection, individual quality rating for nursing home staffing levels (registered nurse +licensed practical nurse +nurse aide), and individual rating for quality measures (function and health status indicators based on Minimum Data Set (MDS) and Medicare claims data) (CMS 2017). Additionally, a stand-alone quality rating for registered nurse staffing levels was also included in the Nursing Home Compare datasets and thus was included in this analysis. Briefly, individual quality ratings for health inspection are based on the number, scope, and severity of deficiencies identified during the three most recent annual inspection surveys, as well as substantiated findings from the most recent 36 months of investigations about complaints. Individual ratings for staffing levels are based on registered nurse (RN) hours per resident day, and total staffing hours (RN+ licensed practical nurse (LPN) + nurse aide hours) per resident day. Other types of nursing-home staff, such as clerical or housekeeping staff, are not included in these staffing numbers. Individual ratings for quality measures are based on performance on 16 of the 24 MDS and Medicare claims-based quality measures, and that are based on MDS 3.0 assessments as well as hospital and emergency department claims (CMS 2017). These include nine long-stay measures and seven short-stay measures.

## References

CMS. Design for Nursing Home Compare Five-Star Quality Rating System: Technical User's Guide, January 2017. Centers for Medicare and Medicaid Services, 2017.

|                                                                                                                                                                                                                                                           |           |
|-----------------------------------------------------------------------------------------------------------------------------------------------------------------------------------------------------------------------------------------------------------|-----------|
| <b>Supplemental Tables</b> .....                                                                                                                                                                                                                          | <b>4</b>  |
| <b>Table 1. Facility- and census-tract-level characteristics for high/low traffic density (total AADT), and by high/low traffic density (combo truck AADT) of major roadways within 300 m buffer.*</b> -----                                              | <b>4</b>  |
| <b>Table 2. Facility-level quality of care measures by distance to nearest major roadway (A1 or A2) * and by high /low traffic density (length) of major roadways (A1 and A2) within 300m buffer. <sup>a</sup></b> -----                                  | <b>7</b>  |
| <b>Table 3. Prevalence ratios of facility-level quality of care measures associated with being located within 150m of major roadways (A1 or A2) and exposure to high traffic density (length) within 300m buffer of major roadways (A1 or A2).*</b> ..... | <b>9</b>  |
| <b>Table 4. Prevalence ratios of facility-level quality of care measures associated with exposure to high traffic density (total AADT) and high traffic density (combo truck AADT) within 300m buffer of major roadways*</b> -----                        | <b>11</b> |
| <b>Table 5. Prevalence ratios of facility- and census-tract-level characteristics* associated with being located within 150m of major roadways (A1 or A2)*, stratified by US region.</b> -----                                                            | <b>13</b> |
| <b>Table 6. Prevalence ratios of facility- and census-tract-level characteristics associated with exposure to high traffic density (length) within 300m buffer of major roadways (A1 or A2)*, stratified by US region.</b> .....                          | <b>15</b> |
| <b>Table 7. Prevalence ratios of facility-level quality of care measures associated with being located within 150m of major roadways (A1 or A2)*, stratified by US region.</b> -----                                                                      | <b>17</b> |
| <b>Table 8. Prevalence ratios of facility-level quality of care measures associated with exposure to high traffic density (length) within 300m buffer of major roadways (A1 or A2), stratified by US region.*</b> .....                                   | <b>19</b> |
| <b>Table 9: List of counties with highest percent (top 1%, 5%, 10%) of nursing residents near major roadways normalized to county area and total road length within the county</b> .....                                                                  | <b>21</b> |
| <b>Table 10: List of counties with highest percent (Top 1%, 5%, 10%) of nursing facilities near major roadways normalized to county area and total road length within the county</b> .....                                                                | <b>29</b> |

## Supplemental Tables

Table 1. Facility- and census-tract-level characteristics for high/low traffic density (total AADT), and by high/low traffic density (combo truck AADT) of major roadways within 300 m buffer.\*

| Characteristics                       | A1&A2 overall AADT (count/year) |              | A1&A2 Combo Truck AADT (count/year) |              |
|---------------------------------------|---------------------------------|--------------|-------------------------------------|--------------|
|                                       | High<br>N (%)                   | Low<br>N (%) | High<br>N (%)                       | Low<br>N (%) |
| All                                   | 3023 (50.10)                    | 3011 (49.90) | 3047 (50.50)                        | 2987 (49.50) |
| <b>Facility-level characteristics</b> |                                 |              |                                     |              |
| <b>Ownership</b>                      | 3023 (50.10)                    | 3011 (49.90) | 3047 (50.50)                        | 2987 (49.50) |
| For profit                            | 2326 (52.77)                    | 2082 (47.23) | 2318 (52.59)                        | 2090 (47.41) |
| Government                            | 125 (35.61)                     | 226 (64.39)  | 187 (53.28)                         | 164 (46.72)  |
| Non profit                            | 572 (44.86)                     | 703 (55.14)  | 542 (42.51)                         | 733 (57.49)  |
| <b>Certification</b>                  | 3023 (50.10)                    | 3011 (49.90) | 3047 (50.50)                        | 2987 (49.50) |
| Medicaid                              | 38 (35.85)                      | 68 (64.15)   | 58 (54.72)                          | 48 (45.28)   |
| Medicare                              | 137 (66.83)                     | 68 (33.17)   | 95(46.34)                           | 110 (53.66)  |
| Both                                  | 2848 (49.76)                    | 2875 (50.24) | 2894 (50.57)                        | 2829 (49.43) |
| <b>Council type</b>                   | 3023 (50.10)                    | 3011 (49.90) | 3047 (50.50)                        | 2987 (49.50) |
| Family                                | 3 (23.08)                       | 10 (76.92)   | 6 (49.15)                           | 7 (53.85)    |
| Resident                              | 2220 (49.52)                    | 2263 (50.48) | 2300 (51.30)                        | 2183 (48.70) |
| Both                                  | 737 (52.31)                     | 672 (47.69)  | 677 (48.05)                         | 732 (51.95)  |
| None                                  | 63 (48.84)                      | 66 (51.16)   | 64 (49.61)                          | 65 (50.39)   |
| <b>Occupancy (beds)</b>               | 3023 (50.10)                    | 3011 (49.90) | 3008 (49.85)                        | 3026 (50.15) |
| >81                                   | 1789 (61.23)                    | 1133 (38.77) | 1458 (49.90)                        | 1464 (50.10) |
| ≤81                                   | 1234 (39.65)                    | 1878 (60.35) | 1550 (49.81)                        | 1562 (50.19) |
| <b>Tract-level characteristics</b>    |                                 |              |                                     |              |
| <b>Regions</b>                        | 3022 (50.09)                    | 3011 (49.91) | 3047 (50.51)                        | 2986 (49.49) |
| Northeast                             | 635 (52.22)                     | 581 (47.78)  | 317 (26.07)                         | 899 (73.93)  |
| West                                  | 340 (54.93)                     | 279 (45.07)  | 284 (45.88)                         | 335 (54.12)  |
| South                                 | 1273 (54.82)                    | 1049 (45.18) | 284 (45.88)                         | 877 (37.77)  |
| Midwest                               | 774 (41.26)                     | 1102 (58.74) | 1001 (53.36)                        | 875 (46.64)  |

|                                 |              |              |              |              |
|---------------------------------|--------------|--------------|--------------|--------------|
| <b>% Urban</b>                  | 2869 (50.09) | 2859 (49.91) | 2869 (50.09) | 2859 (49.91) |
| 100%                            | 1896 (68.45) | 874 (31.55)  | 1347 (48.63) | 1423 (51.37) |
| <100%                           | 973 (32.89)  | 1985 (67.11) | 1522 (51.45) | 1436 (48.55) |
| <b>% Non-White</b>              | 2869 (50.09) | 2859 (49.91) | 2869 (50.09) | 2859 (49.91) |
| >15%                            | 1573 (59.45) | 1073 (40.55) | 1392 (42.61) | 1254 (47.39) |
| ≤15%                            | 1296 (42.05) | 1786 (57.95) | 1477 (47.92) | 1605 (52.08) |
| <b>Household median income</b>  | 2869 (50.11) | 2856 (49.89) | 2869 (50.11) | 2856 (49.89) |
| >46,000                         | 1590 (58.48) | 1129 (41.52) | 1306 (48.03) | 1412 (51.97) |
| ≤46,000                         | 1279 (42.55) | 1727 (57.45) | 1563 (52.00) | 1443 (48.00) |
| <b>Quality of care</b>          |              |              |              |              |
| <b>Overall rating</b>           | 2958 (50.02) | 2956 (49.98) | 2984 (50.46) | 2930 (49.54) |
| 5 (highest)                     | 771 (51.06)  | 739 (48.94)  | 717 (47.48)  | 793 (52.52)  |
| 4                               | 730 (50.31)  | 721 (49.69)  | 750 (51.69)  | 701 (48.31)  |
| 3                               | 546 (47.64)  | 600 (52.36)  | 581 (50.70)  | 565 (49.30)  |
| 2                               | 612 (51.43)  | 578 (48.57)  | 592 (49.75)  | 598 (50.25)  |
| 1                               | 299 (48.46)  | 318 (51.54)  | 344 (55.75)  | 273 (44.25)  |
| <b>Health Inspection Rating</b> | 2958 (50.02) | 2956 (49.98) | 2984 (50.46) | 2930 (49.54) |
| 5 (highest)                     | 297 (47.52)  | 328 (52.48)  | 309 (49.44)  | 316 (50.56)  |
| 4                               | 642 (48.49)  | 682 (51.51)  | 653 (49.32)  | 671 (50.68)  |
| 3                               | 688 (49.00)  | 716 (51.00)  | 713 (50.78)  | 691 (49.22)  |
| 2                               | 736 (52.05)  | 678 (47.95)  | 719 (50.85)  | 695 (49.15)  |
| 1                               | 595 (51.87)  | 522 (48.13)  | 590 (51.44)  | 557 (48.56)  |
| <b>Quality rating</b>           | 2952 (49.97) | 2955 (50.03) | 2980 (50.45) | 2927 (49.55) |
| 5 (highest)                     | 1281 (55.48) | 1028 (44.52) | 1156 (50.06) | 1153 (49.94) |
| 4                               | 1063 (49.28) | 1094 (50.72) | 1075 (49.84) | 1082 (50.16) |
| 3                               | 398 (44.37)  | 499 (55.63)  | 468 (52.17)  | 429 (47.83)  |
| 2                               | 162 (39.90)  | 244 (60.10)  | 216 (53.20)  | 190 (46.80)  |
| 1                               | 48 (34.78)   | 90 (65.22)   | 65 (47.10)   | 73 (52.90)   |
| <b>Staffing rating</b>          | 2907 (49.87) | 2922 (50.13) | 2931 (50.28) | 2898 (49.72) |

|                                        |              |              |              |              |
|----------------------------------------|--------------|--------------|--------------|--------------|
| 5 (highest)                            | 257 (51.61)  | 241 (48.39)  | 230 (46.18)  | 268 (53.82)  |
| 4                                      | 1244 (49.40) | 1274 (50.60) | 1232 (48.93) | 1286 (51.07) |
| 3                                      | 582 (49.40)  | 594 (50.51)  | 581 (49.40)  | 595 (50.60)  |
| 2                                      | 453 (50.11)  | 451 (49.89)  | 464 (51.33)  | 440 (48.67)  |
| 1                                      | 371 (50.61)  | 362 (49.39)  | 424 (57.84)  | 309 (42.16)  |
| <b>RN <sup>a</sup> staffing rating</b> | 2907 (49.87) | 2922 (50.13) | 2931 (50.28) | 2898 (49.72) |
| 5 (highest)                            | 510 (46.75)  | 581 (53.25)  | 470 (43.08)  | 621 (56.92)  |
| 4                                      | 750 (50.37)  | 739 (49.63)  | 687 (46.14)  | 802 (53.86)  |
| 3                                      | 813 (49.97)  | 813 (50.03)  | 840 (51.69)  | 785 (48.31)  |
| 2                                      | 516 (49.95)  | 517 (50.05)  | 575 (55.66)  | 458 (44.34)  |
| 1                                      | 319 (53.98)  | 272 (46.02)  | 359 (60.74)  | 232 (39.26)  |

---

\* Data for Alaska, Hawaii, and Puerto Rico were excluded. All analyses was restricted to facility not in hospital.

<sup>a</sup> RN: Registered Nurse

Table 2. Facility-level quality of care measures by distance to nearest major roadway (A1 or A2) \* and by high /low traffic density (length) of major roadways (A1 and A2) within 300m buffer. <sup>a</sup>

| Quality of care                        | Distance to A1/A2 (m) |               | A1&A2 traffic density (length) in 300m buffer (m) |             |
|----------------------------------------|-----------------------|---------------|---------------------------------------------------|-------------|
|                                        | ≤150<br>N (%)         | >150<br>N (%) | >0<br>N (%)                                       | =0<br>N (%) |
| <b>Overall rating</b>                  | 3838 (28)             | 9654 (72)     | 5914 (41)                                         | 8448 (59)   |
| 5 (highest)                            | 964 (28)              | 2517 (72)     | 1510 (41)                                         | 2195 (59)   |
| 4                                      | 984 (29)              | 2439 (71)     | 1451 (40)                                         | 2214 (60)   |
| 3                                      | 731 (30)              | 1715 (70)     | 1146 (44)                                         | 1471 (56)   |
| 2                                      | 759 (27)              | 2057 (73)     | 1190 (40)                                         | 1789 (60)   |
| 1                                      | 400 (30)              | 926 (70)      | 617 (44)                                          | 779 (56)    |
| <b>Health Inspection Rating</b>        | 3838 (28)             | 9654 (72)     | 5914 (41)                                         | 8448 (59)   |
| 5 (highest)                            | 399 (29)              | 979 (71)      | 625 (42)                                          | 850 (58)    |
| 4                                      | 877 (28)              | 2208 (72)     | 1324 (40)                                         | 1972 (60)   |
| 3                                      | 906 (29)              | 2232 (71)     | 1404 (42)                                         | 1963 (58)   |
| 2                                      | 924 (29)              | 2251 (71)     | 1414 (42)                                         | 1961 (58)   |
| 1                                      | 732 (27)              | 1984 (73)     | 1147 (40)                                         | 1702 (60)   |
| <b>Quality rating</b>                  | 38834 (28)            | 9646 (72)     | 5907 (41)                                         | 8442 (59)   |
| 5 (highest)                            | 1498 (27)             | 4084 (73)     | 2309 (39)                                         | 3607 (61)   |
| 4                                      | 1405 (29)             | 3461 (71)     | 2157 (42)                                         | 3002 (58)   |
| 3                                      | 579 (30)              | 1359 (70)     | 897 (43)                                          | 1193 (57)   |
| 2                                      | 267 (33)              | 551 (67)      | 406 (46)                                          | 470 (54)    |
| 1                                      | 85 (31)               | 191 (69)      | 138 (45)                                          | 170 (55)    |
| <b>Staffing rating</b>                 | 3784 (28)             | 9498 (72)     | 5829 (41)                                         | 8309 (59)   |
| 5 (highest)                            | 307 (25)              | 922 (75)      | 498 (38)                                          | 817 (62)    |
| 4                                      | 1622 (28)             | 4200 (72)     | 2518 (41)                                         | 3647 (59)   |
| 3                                      | 782 (30)              | 1867 (70)     | 1176 (42)                                         | 1652 (58)   |
| 2                                      | 609 (31)              | 1369 (69)     | 904 (43)                                          | 1219 (57)   |
| 1                                      | 464 (29)              | 1140 (71)     | 773 (43)                                          | 974 (57)    |
| <b>RN <sup>b</sup> staffing rating</b> | 3784 (28)             | 9498 (72)     | 5829 (41)                                         | 8309 (59)   |
| 5 (highest)                            | 688 (27)              | 1872 (73)     | 1091 (40)                                         | 1612 (60)   |
| 4                                      | 992 (28)              | 2525 (72)     | 1489 (40)                                         | 2230 (60)   |

|   |           |           |           |           |
|---|-----------|-----------|-----------|-----------|
| 3 | 1080 (30) | 2544 (70) | 1625 (42) | 2249 (58) |
| 2 | 654 (30)  | 1543 (70) | 1033 (44) | 1337 (56) |
| 1 | 370 (27)  | 1014 (73) | 591 (40)  | 881 (60)  |

\* The nursing homes with distance to major roadway equal to 0 were excluded for our study.

<sup>a</sup> Data for Alaska, Hawaii, and Puerto Rico were excluded. All analyses was restricted to facility not in hospital.

<sup>b</sup> RN: Registered Nurses



Table 3. Prevalence ratios of facility-level quality of care measures associated with being located within 150m of major roadways (A1 or A2) and exposure to high traffic density (length) within 300m buffer of major roadways (A1 or A2).\*

| Quality of care                        | Distance to A1 or A2 ≤150 m<br>PR (95% CI) | High traffic density (length)<br>PR (95% CI) |
|----------------------------------------|--------------------------------------------|----------------------------------------------|
| <b>Overall rating</b>                  |                                            |                                              |
| 5 (highest)                            | 0.887 (0.772 – 1.019)                      | <b>0.869 (0.767 – 0.984)</b>                 |
| 4                                      | 0.934 (0.813 – 1.073)                      | <b>0.827 (0.730 – 0.937)</b>                 |
| 3                                      | 0.987 (0.853 – 1.142)                      | 0.984 (0.863 – 1.121)                        |
| 2                                      | <b>0.854 (0.740 – 0.986)</b>               | <b>0.840 (0.7398 – 0.955)</b>                |
| 1                                      | -                                          | -                                            |
| <b>Health Inspection Rating</b>        |                                            |                                              |
| 5 (highest)                            | 1.105 (0.956 – 1.276)                      | 1.070 (0.967 – 1.184)                        |
| 4                                      | 1.077 (0.959 – 1.208)                      | 1.061 (0.959 – 1.175)                        |
| 3                                      | 1.100 (0.981 – 1.234)                      | 0.996 (0.899 – 1.104)                        |
| 2                                      | 1.113 (0.956 – 1.276)                      | 1.070 (0.960 – 1.240)                        |
| 1                                      | -                                          | -                                            |
| <b>Quality rating</b>                  |                                            |                                              |
| 5 (highest)                            | 0.824 (0.634 – 1.071)                      | <b>0.789 (0.626 – 0.993)</b>                 |
| 4                                      | 0.712 (0.701 – 1.187)                      | 0.885 (0.702 – 1.115)                        |
| 3                                      | 0.957 (0.728 – 1.258)                      | 0.926 (0.728 – 1.178)                        |
| 2                                      | 1.089 (0.811 – 1.462)                      | 1.064 (0.820 – 1.381)                        |
| 1                                      | -                                          | -                                            |
| <b>Staffing rating</b>                 |                                            |                                              |
| 5 (highest)                            | <b>0.818 (0.691 – 0.968)</b>               | <b>0.810 (0.699 – 0.938)</b>                 |
| 4                                      | 0.949 (0.840 – 1.072)                      | 0.917 (0.823 – 1.023)                        |
| 3                                      | 1.029 (0.898 – 1.180)                      | 0.946 (0.838 – 1.068)                        |
| 2                                      | 1.093 (0.946 – 1.262)                      | 0.985 (0.866 – 1.121)                        |
| 1                                      | -                                          | -                                            |
| <b>RN <sup>a</sup> staffing rating</b> |                                            |                                              |
| 5 (highest)                            | 1.007 (0.869 – 1.167)                      | 1.009 (0.886 – 1.148)                        |
| 4                                      | 1.077 (0.936 – 1.238)                      | 0.995 (0.880 – 1.126)                        |
| 3                                      | <b>1.163 (1.013 – 1.238)</b>               | 1.007 (0.953 – 1.217)                        |

|   |                       |                              |
|---|-----------------------|------------------------------|
| 2 | 1.162 (0.869 – 1.167) | <b>1.152 (1.009 – 1.314)</b> |
| 1 | -                     | -                            |

---

\*The nursing homes with distance to major roadway equal to 0 were excluded for our study. All analyses was restricted to facility not in hospital. Data for Alaska, Hawaii, and Puerto Rico were excluded.

<sup>a</sup> RN: Registered Nurses

Table 4. Prevalence ratios of facility-level quality of care measures associated with exposure to high traffic density (total AADT) and high traffic density (combo truck AADT) within 300m buffer of major roadways\*

| Characteristics                        | A1&A2 total AADT in 300m<br>buffer (count/year)<br>PR (95% CI) | A1&A2 combo truck AADT in 300m<br>buffer (count/year)<br>PR (95% CI) |
|----------------------------------------|----------------------------------------------------------------|----------------------------------------------------------------------|
| <b>Quality of care</b>                 |                                                                |                                                                      |
| <b>Overall rating</b>                  |                                                                |                                                                      |
| 5 (highest)                            | 1.110 (0.920 – 1.338)                                          | <b>0.718 (0.594 – 0.866)</b>                                         |
| 4                                      | 1.077 (0.892 – 1.300)                                          | 0.849 (0.703 – 1.026)                                                |
| 3                                      | 0.968 (0.796 – 1.177)                                          | <b>0.816 (0.670 – 0.993)</b>                                         |
| 2                                      | 1.126 (0.927 – 1.368)                                          | <b>0.786 (0.646 – 0.995)</b>                                         |
| 1                                      | -                                                              | -                                                                    |
| <b>Health Inspection Rating</b>        |                                                                |                                                                      |
| 5 (highest)                            | 0.840 (0.691 – 1.021)                                          | 0.923 (0.760 – 1.122)                                                |
| 4                                      | 0.873 (0.746 – 1.023)                                          | 0.919 (0.784 – 1.076)                                                |
| 3                                      | 0.891 (0.763 – 1.042)                                          | 0.974 (0.833 – 1.139)                                                |
| 2                                      | 1.007 (0.862 – 1.177)                                          | 0.977 (0.836 – 1.151)                                                |
| 1                                      | -                                                              | -                                                                    |
| <b>Quality rating</b>                  |                                                                |                                                                      |
| 5 (highest)                            | <b>2.336 (1.630 – 3.348)</b>                                   | 1.126 (0.798 – 1.588)                                                |
| 4                                      | <b>1.822 (1.271 – 2.612)</b>                                   | 1.116 (0.790 – 1.575)                                                |
| 3                                      | <b>1.495 (1.029 – 2.174)</b>                                   | 1.225 (0.855 – 1.754)                                                |
| 2                                      | 1.245 (0.832 – 1.862)                                          | 1.276 (0.867 – 1.879)                                                |
| 1                                      | -                                                              | -                                                                    |
| <b>Staffing rating</b>                 |                                                                |                                                                      |
| 5 (highest)                            | 1.040 (0.829 – 1.307)                                          | <b>0.625 (0.497 – 0.787)</b>                                         |
| 4                                      | 0.953 (0.808 – 1.123)                                          | <b>0.698 (0.591 – 0.824)</b>                                         |
| 3                                      | 0.956 (0.795 – 1.150)                                          | <b>0.712 (0.591 – 0.857)</b>                                         |
| 2                                      | 0.980 (0.807 – 1.191)                                          | <b>0.769 (0.632 – 0.935)</b>                                         |
| 1                                      | -                                                              | -                                                                    |
| <b>RN <sup>a</sup> staffing rating</b> |                                                                |                                                                      |
| 5 (highest)                            | <b>0.749 (0.613 – 0.915)</b>                                   | <b>0.489 (0.399 – 0.600)</b>                                         |

|   |                              |                              |
|---|------------------------------|------------------------------|
| 4 | 0.866 (0.715 – 1.048)        | <b>0.554 (0.456 – 0.672)</b> |
| 3 | 0.852 (0.705 – 1.029)        | <b>0.692 (0.571 – 0.838)</b> |
| 2 | <b>0.851 (0.695 – 0.915)</b> | <b>0.811 (0.660 – 0.997)</b> |
| 1 | -                            | -                            |

---

\*The nursing homes with distance to major roadway equal to 0 were excluded for our study. All analyses was restricted to facility not in hospital. Data for Alaska, Hawaii, and Puerto Rico were excluded.

<sup>a</sup> RN: Registered Nurses

Table 5. Prevalence ratios of facility- and census-tract-level characteristics\* associated with being located within 150m of major roadways (A1 or A2)\*, stratified by US region.

| Characteristics                       | Logistic Regression (Distance to A1/A2 ≤150m) |                              |                              |                              |
|---------------------------------------|-----------------------------------------------|------------------------------|------------------------------|------------------------------|
|                                       | West<br>PR (95% CI)                           | Midwest<br>PR (95% CI)       | South<br>PR (95% CI)         | Northeast<br>PR (95% CI)     |
| <b>Facility-level characteristics</b> |                                               |                              |                              |                              |
| <b>Ownership</b>                      |                                               |                              |                              |                              |
| For profit                            | 0.988 (0.697 – 1.402)                         | <b>1.166 (1.002 – 1.356)</b> | <b>1.194 (1.005 – 1.420)</b> | 1.169 (0.971 – 1.408)        |
| Government                            | 1.794 (0.908 – 3.547)                         | <b>1.286 (1.010 – 1.637)</b> | 1.243 (0.899 – 1.719)        | 0.870 (0.520 – 1.456)        |
| Non profit                            | -                                             | -                            | -                            | -                            |
| <b>Certification</b>                  |                                               |                              |                              |                              |
| Medicaid                              | 1.508 (0.843 – 2.698)                         | 0.674 (0.416 – 1.093)        | 0.923 (0.557 – 1.530)        | 1.783 (0.705 – 4.509)        |
| Medicare                              | 1.073 (0.676 – 1.704)                         | 0.911 (0.576 – 1.440)        | <b>0.653 (0.468 – 0.912)</b> | 0.964 (0.626 – 1.486)        |
| Both                                  | -                                             | -                            | -                            | -                            |
| <b>Council type</b>                   |                                               |                              |                              |                              |
| Family                                | 0.947 (0.103 – 8.699)                         | 1.323 (0.142 – 12.356)       | 1.060 (0.291 – 3.855)        | 1.579 (0.205 – 12.173)       |
| Resident                              | 0.795 (0.448 – 1.412)                         | <b>2.029 (1.304 – 3.158)</b> | 1.020 (0.631 – 1.650)        | 0.891 (0.497 – 1.598)        |
| Both                                  | 0.944 (0.507 – 1.756)                         | <b>1.793 (1.130 – 2.844)</b> | 0.923 (0.565 – 1.507)        | 0.871 (0.480 – 1.580)        |
| None                                  | -                                             | -                            | -                            | -                            |
| <b>Occupancy (beds)</b>               |                                               |                              |                              |                              |
| >81                                   | <b>0.772 (0.646 – 0.924)</b>                  | 0.902 (0.786 – 1.035)        | 0.916 (0.809 – 1.036)        | <b>0.778 (0.609 – 0.993)</b> |
| ≤81                                   | -                                             | -                            | -                            | -                            |
| <b>Tract-level characteristics</b>    |                                               |                              |                              |                              |
| <b>% Urban</b>                        |                                               |                              |                              |                              |
| 100%                                  | <b>0.581 (0.441 – 0.765)</b>                  | <b>0.737 (0.643 – 0.844)</b> | <b>0.614 (0.540 – 0.698)</b> | <b>0.649 (0.543 – 0.776)</b> |
| <100%                                 | -                                             | -                            | -                            | -                            |
| <b>% Non-White</b>                    |                                               |                              |                              |                              |
| >15%                                  | <b>0.704 (0.544 – 0.911)</b>                  | <b>0.742 (0.635 – 0.867)</b> | <b>0.812 (0.710 – 0.928)</b> | <b>0.621 (0.518 – 0.745)</b> |
| ≤15%                                  | -                                             | -                            | -                            | -                            |
| <b>Household median income</b>        |                                               |                              |                              |                              |

|         |                       |                       |                              |                       |
|---------|-----------------------|-----------------------|------------------------------|-----------------------|
| >46,000 | 0.955 (0.747 – 1.220) | 1.061 (0.929 – 1.213) | <b>0.829 (0.728 – 0.945)</b> | 1.160 (0.957 – 1.407) |
| ≤46,000 | -                     | -                     | -                            | -                     |

\*The nursing homes with distance to major roadway equal to 0 were excluded for our study. Data for Alaska, Hawaii, and Puerto Rico were excluded. All analyses was restricted to facility not in hospital.

<sup>a</sup> RN: Registered Nurses

Table 6. Prevalence ratios of facility- and census-tract-level characteristics associated with exposure to high traffic density (length) within 300m buffer of major roadways (A1 or A2)\*, stratified by US region.

| Characteristics                       | Logistic Regression (High traffic density (length)) |                              |                              |                              |
|---------------------------------------|-----------------------------------------------------|------------------------------|------------------------------|------------------------------|
|                                       | West<br>PR (95% CI)                                 | Midwest<br>PR (95% CI)       | South<br>PR (95% CI)         | Northeast<br>PR (95% CI)     |
| <b>Facility-level characteristics</b> |                                                     |                              |                              |                              |
| <b>Ownership</b>                      |                                                     |                              |                              |                              |
| For profit                            | 0.954 (0.729 – 1.250)                               | 1.026 (0.899 – 1.171)        | <b>1.197 (1.027 – 1.394)</b> | <b>1.213 (1.022 – 1.439)</b> |
| Government                            | 1.089 (0.615 – 1.929)                               | 1.024 (0.827 – 1.268)        | 1.025 (0.770 – 1.366)        | 0.851 (0.547 – 1.324)        |
| Non profit                            | -                                                   | -                            | -                            | -                            |
| <b>Certification</b>                  |                                                     |                              |                              |                              |
| Medicaid                              | 0.967 (0.579 – 1.614)                               | 0.867 (0.588 – 1.280)        | 0.730 (0.477 – 1.116)        | 1.090 (0.452 – 2.629)        |
| Medicare                              | 1.046 (0.729 – 1.500)                               | 0.899 (0.599 – 1.351)        | <b>0.677 (0.510 – 0.899)</b> | 0.818 (0.551 – 1.214)        |
| Both                                  | -                                                   | -                            | -                            | -                            |
| <b>Council type</b>                   |                                                     |                              |                              |                              |
| Family                                | 0.889 (0.162 – 4.873)                               | 1.736 (0.280 – 10.751)       | 1.412 (0.438 – 4.552)        | 1.800 (0.278 – 11.635)       |
| Resident                              | 0.868 (0.545 – 1.384)                               | <b>1.692 (1.183 – 2.419)</b> | 1.392 (0.905 – 2.142)        | 1.126 (0.657 – 1.931)        |
| Both                                  | 0.904 (0.545 – 1.499)                               | 1.434 (0.985 – 2.089)        | 1.291 (0.832 – 2.002)        | 1.021 (0.589 – 1.769)        |
| None                                  | -                                                   | -                            | -                            | -                            |
| <b>Occupancy (beds)</b>               |                                                     |                              |                              |                              |
| >81                                   | <b>0.748 (0.632 – 0.885)</b>                        | <b>0.856 (0.758 – 0.967)</b> | 0.946 (0.847 – 1.057)        | <b>0.818 (0.677 – 0.988)</b> |
| ≤81                                   | -                                                   | -                            | -                            | -                            |
| <b>Tract-level characteristics</b>    |                                                     |                              |                              |                              |
| <b>% Urban</b>                        |                                                     |                              |                              |                              |
| 100%                                  | <b>0.536 (0.430 – 0.668)</b>                        | <b>0.744 (0.660 – 0.840)</b> | <b>0.677 (0.603 – 0.759)</b> | <b>0.724 (0.610 – 0.858)</b> |
| <100%                                 | -                                                   | -                            | -                            | -                            |
| <b>% Non-White</b>                    |                                                     |                              |                              |                              |
| >15%                                  | <b>0.700 (0.570 – 0.859)</b>                        | <b>0.708 (0.618 – 0.812)</b> | <b>0.852 (0.754 – 0.963)</b> | <b>0.755 (0.640 – 0.892)</b> |
| ≤15%                                  | -                                                   | -                            | -                            | -                            |
| <b>Household median income</b>        |                                                     |                              |                              |                              |

|         |                              |                       |                              |                       |
|---------|------------------------------|-----------------------|------------------------------|-----------------------|
| >46,000 | <b>0.910 (0.752 – 1.103)</b> | 0.917 (0.814 – 1.032) | <b>0.782 (0.696 – 0.879)</b> | 0.969 (0.810 – 1.159) |
| ≤46,000 | -                            | -                     | -                            | -                     |

\*The nursing homes with distance to major roadway equal to 0 were excluded for our study. Data for Alaska, Hawaii, and Puerto Rico were excluded. All analyses were restricted to facility not in hospital.

<sup>a</sup> RN: Registered Nurses



Table 7. Prevalence ratios of facility-level quality of care measures associated with being located within 150m of major roadways (A1 or A2)\*, stratified by US region.

| Quality of care                        | Logistic Regression (Distance to A1/A2 ≤150m) |                              |                              |                              |
|----------------------------------------|-----------------------------------------------|------------------------------|------------------------------|------------------------------|
|                                        | West<br>PR (95% CI)                           | Midwest<br>PR (95% CI)       | South<br>PR (95% CI)         | Northeast<br>PR (95% CI)     |
| <b>Overall rating</b>                  |                                               |                              |                              |                              |
| 5 (highest)                            | 1.347 (0.742 – 2.443)                         | 0.822 (0.643 – 1.052)        | 1.088 (0.874 – 1.156)        | 0.862 (0.622 – 1.196)        |
| 4                                      | 1.373 (0.750 – 2.514)                         | 0.841 (0.660 – 1.072)        | 1.071 (0.863 – 1.328)        | 0.983 (0.705 – 1.371)        |
| 3                                      | 1.085 (0.572 – 2.058)                         | 0.853 (0.661 – 1.102)        | 1.189 (0.950 – 1.489)        | 1.104 (0.777 – 1.569)        |
| 2                                      | 1.374 (0.738 – 2.555)                         | <b>0.731 (0.566 – 0.944)</b> | 0.927 (0.743 – 1.156)        | 0.935 (0.664 – 1.315)        |
| 1                                      | -                                             | -                            | -                            | -                            |
| <b>Health Inspection Rating</b>        |                                               |                              |                              |                              |
| 5 (highest)                            | 1.361 (0.874 – 2.117)                         | 1.037 (0.801 – 1.343)        | 1.207 (0.950 – 1.533)        | 0.919 (0.666 – 1.233)        |
| 4                                      | 1.012 (0.696 – 1.473)                         | 1.178 (0.962 – 1.443)        | 1.164 (0.960 – 1.410)        | 0.816 (0.631 – 1.055)        |
| 3                                      | 1.088 (0.754 – 1.570)                         | 1.116 (0.911 – 1.367)        | 1.152 (0.952 – 1.394)        | 1.015 (0.785 – 1.313)        |
| 2                                      | 0.983 (0.676 – 1.430)                         | 1.142 (0.934 – 1.397)        | 1.138 (0.940 – 1.376)        | 1.087 (0.842 – 1.403)        |
| 1                                      | -                                             | -                            | -                            | -                            |
| <b>Quality rating</b>                  |                                               |                              |                              |                              |
| 5 (highest)                            | 0.786 (0.321 – 1.927)                         | 0.830 (0.541 – 1.273)        | 0.774 (0.522 – 1.146)        | 1.464 (0.528 – 4.061)        |
| 4                                      | 0.949 (0.385 – 2.341)                         | 0.862 (0.562 – 1.322)        | 0.760 (0.512 – 1.128)        | 1.861 (0.671 – 5.166)        |
| 3                                      | 0.763 (0.296 – 1.967)                         | 0.868 (0.556 – 1.355)        | 0.929 (0.616 – 1.401)        | 2.019 (0.712 – 5.725)        |
| 2                                      | 1.014 (0.365 – 2.821)                         | 1.100 (0.682 – 1.773)        | 0.952 (0.611 – 1.484)        | 2.076 (0.693 – 6.221)        |
| 1                                      | -                                             | -                            | -                            | -                            |
| <b>Staffing rating</b>                 |                                               |                              |                              |                              |
| 5 (highest)                            | 1.225 (0.547 – 2.742)                         | 0.741 (0.547 – 1.003)        | 0.835 (0.599 – 1.163)        | <b>1.499 (1.020 – 2.202)</b> |
| 4                                      | 1.065 (0.495 – 2.290)                         | 0.846 (0.671 – 1.068)        | 1.148 (0.964 – 1.368)        | <b>1.551 (1.132 – 2.123)</b> |
| 3                                      | 1.046 (0.470 – 2.326)                         | 0.941 (0.728 – 1.216)        | 1.167 (0.958 – 1.423)        | <b>1.533 (1.088 – 2.161)</b> |
| 2                                      | 1.074 (0.458 – 2.517)                         | 0.978 (0.747 – 1.280)        | 1.127 (0.916 – 1.387)        | <b>1.626 (1.138 – 2.323)</b> |
| 1                                      | -                                             | -                            | -                            | -                            |
| <b>RN <sup>a</sup> staffing rating</b> |                                               |                              |                              |                              |
| 5 (highest)                            | <b>2.182 (1.067 – 4.463)</b>                  | 0.830 (0.612 – 1.125)        | 1.030 (0.780 – 1.359)        | <b>1.878 (1.192 – 2.958)</b> |
| 4                                      | 1.780 (0.867 – 3.651)                         | 0.835 (0.620 – 1.123)        | <b>1.319 (1.076 – 1.617)</b> | <b>1.883 (1.202 – 2.949)</b> |

|   |                       |                       |                              |                              |
|---|-----------------------|-----------------------|------------------------------|------------------------------|
| 3 | 1.738 (0.839 – 3.601) | 0.845 (0.627 – 1.138) | <b>1.361 (1.133 – 1.635)</b> | <b>2.060 (1.306 – 3.248)</b> |
| 2 | 1.618 (0.728 – 3.600) | 1.075 (0.779 – 1.482) | 1.145 (0.945 – 1.386)        | 1.534 (0.940 – 2.505)        |
| 1 | -                     | -                     | -                            | -                            |

---

\*The nursing homes with distance to major roadway equal to 0 were excluded for our study. Data for Alaska, Hawaii, and Puerto Rico were excluded. All analyses was restricted to facility not in hospital.

<sup>a</sup> RN: Registered Nurses

Table 8. Prevalence ratios of facility-level quality of care measures associated with exposure to high traffic density (length) within 300m buffer of major roadways (A1 or A2), stratified by US region.\*

| Quality of care                        | Logistic Regression (High traffic density (length)) |                              |                       |                              |
|----------------------------------------|-----------------------------------------------------|------------------------------|-----------------------|------------------------------|
|                                        | West<br>PR (95% CI)                                 | Midwest<br>PR (95% CI)       | South<br>PR (95% CI)  | Northeast<br>PR (95% CI)     |
| <b>Overall rating</b>                  |                                                     |                              |                       |                              |
| 5 (highest)                            | 0.954 (0.620 – 1.468)                               | 0.912 (0.729 – 1.140)        | 1.007 (0.828 – 1.226) | 0.808 (0.595 – 1.097)        |
| 4                                      | 0.923 (0.594 – 1.435)                               | <b>0.794 (0.636 – 0.991)</b> | 0.921 (0.759 – 1.117) | 0.858 (0.628 – 1.172)        |
| 3                                      | 0.979 (0.618 – 1.549)                               | 0.904 (0.716 – 1.140)        | 1.139 (0.930 – 1.394) | 1.083 (0.778 – 1.507)        |
| 2                                      | 1.124 (0.716 – 1.764)                               | <b>0.744 (0.590 – 0.938)</b> | 0.920 (0.756 – 1.120) | 0.830 (0.603 – 1.143)        |
| 1                                      | -                                                   | -                            | -                     | -                            |
| <b>Health Inspection Rating</b>        |                                                     |                              |                       |                              |
| 5 (highest)                            | 0.982 (0.710 – 1.251)                               | <b>1.255 (1.002 – 1.367)</b> | 1.078 (0.870 – 1.337) | 0.932 (0.693 – 1.254)        |
| 4                                      | 0.865 (0.649 – 1.154)                               | 1.111 (0.926 – 1.332)        | 1.046 (0.881 – 1.242) | 0.813 (0.641 – 1.031)        |
| 3                                      | 0.872 (0.656 – 1.158)                               | 1.138 (0.951 – 1.362)        | 1.094 (0.923 – 1.296) | 1.035 (0.814 – 1.316)        |
| 2                                      | 0.943 (0.710 – 1.251)                               | 1.142 (0.955 – 1.367)        | 1.096 (0.926 – 1.299) | 1.003 (0.790 – 1.275)        |
| 1                                      | -                                                   | -                            | -                     | -                            |
| <b>Quality rating</b>                  |                                                     |                              |                       |                              |
| 5 (highest)                            | <b>0.375 (0.191 – 0.739)</b>                        | 0.791 (0.542 – 1.154)        | 0.938 (0.660 – 1.333) | 1.128 (0.479 – 2.660)        |
| 4                                      | <b>0.453 (0.229 – 0.896)</b>                        | 0.795 (0.545 – 1.161)        | 1.009 (0.709 – 1.435) | 1.424 (0.603 – 3.362)        |
| 3                                      | <b>0.388 (0.190 – 0.792)</b>                        | 0.851 (0.575 – 1.262)        | 1.116 (0.772 – 1.613) | 1.620 (0.671 – 3.911)        |
| 2                                      | 0.721 (0.329 – 1.541)                               | 0.991 (0.648 – 1.516)        | 1.092 (0.732 – 1.628) | 2.053 (0.797 – 5.285)        |
| 1                                      | -                                                   | -                            | -                     | -                            |
| <b>Staffing rating</b>                 |                                                     |                              |                       |                              |
| 5 (highest)                            | 1.059 (0.572 – 1.959)                               | <b>0.763 (0.583 – 0.998)</b> | 0.972 (0.730 – 1.295) | 1.199 (0.849 – 1.693)        |
| 4                                      | 0.956 (0.535 – 1.711)                               | 0.918 (0.743 – 1.134)        | 1.038 (0.888 – 1.213) | <b>1.325 (1.002 – 1.751)</b> |
| 3                                      | 0.833 (0.452 – 1.535)                               | 0.950 (0.752 – 1.199)        | 1.060 (0.888 – 1.266) | 1.269 (0.934 – 1.724)        |
| 2                                      | 0.876 (0.456 – 1.682)                               | 0.981 (0.768 – 1.253)        | 1.033 (0.859 – 1.243) | 1.328 (0.899 – 1.706)        |
| 1                                      | -                                                   | -                            | -                     | -                            |
| <b>RN <sup>a</sup> staffing rating</b> |                                                     |                              |                       |                              |
| 5 (highest)                            | <b>1.723 (1.054 – 2.818)</b>                        | 1.002 (0.759 – 1.322)        | 0.980 (0.767 – 1.253) | <b>1.783 (1.201 – 2.649)</b> |
| 4                                      | 1.330 (0.812 – 2.180)                               | 0.969 (0.739 – 1.271)        | 1.153 (0.961 – 1.383) | <b>1.595 (1.080 – 2.356)</b> |

|   |                       |                       |                              |                              |
|---|-----------------------|-----------------------|------------------------------|------------------------------|
| 3 | 1.345 (0.814 – 2.221) | 0.997 (0.760 – 1.309) | <b>1.196 (1.015 – 1.408)</b> | <b>1.700 (1.143 – 2.527)</b> |
| 2 | 1.315 (0.750 – 2.304) | 1.212 (0.902 – 1.628) | 1.111 (0.939 – 1.315)        | <b>1.552 (1.012 – 2.379)</b> |
| 1 | -                     | -                     | -                            | -                            |

---

\* Data for Alaska, Hawaii, and Puerto Rico were excluded. All analyses was restricted to facility not in hospital.

<sup>a</sup> RN: Registered Nurses

Table 9: List of counties with highest percent (top 1%, 5%, 10%) of nursing residents near major roadways normalized to county area and total road length within the county

| Percentile | State | County Name          |
|------------|-------|----------------------|
| Top 1%     | VA    | FAIRFAX CITY         |
|            | VA    | WINCHESTER           |
|            | VA    | NORTON               |
|            | VA    | HOPEWELL             |
|            | VA    | EMPORIA              |
|            | NY    | NEW YORK             |
|            | VA    | WAYNESBORO           |
|            | VA    | HARRISONBURG         |
|            | VA    | STAUNTON             |
|            | RI    | BRISTOL              |
|            | VA    | ALEXANDRIA           |
|            | VA    | PETERSBURG           |
|            | NY    | RICHMOND             |
|            | VA    | ARLINGTON            |
|            | NY    | BRONX                |
|            | NY    | KINGS                |
|            | VA    | PORTSMOUTH           |
|            | CA    | SAN FRANCISCO        |
|            | DC    | DISTRICT OF COLUMBIA |
|            | WV    | HANCOCK              |
|            | VA    | DANVILLE             |

|    |                |
|----|----------------|
| NM | LOS ALAMOS     |
| NJ | HUDSON         |
| VA | ROANOKE CITY   |
| VA | LYNCHBURG      |
| VA | HAMPTON        |
| KY | ROBERTSON      |
| VA | RICHMOND CITY  |
| MA | SUFFOLK        |
| TN | MOORE          |
| MO | ST. LOUIS CITY |
| IN | UNION          |
| IN | FAYETTE        |
| TX | ROCKWALL       |
| VA | NEWPORT NEWS   |
| TN | TROUSDALE      |
| IL | EDWARDS        |
| RI | NEWPORT        |
| IL | WABASH         |
| PA | MONTOUR        |
| WV | OHIO           |
| NJ | UNION          |
| VA | NORFOLK        |
| GA | OCONEE         |

|    |                |
|----|----------------|
| GA | CLAY           |
| NJ | ESSEX          |
| GA | STEPHENS       |
| MD | BALTIMORE CITY |
| VA | WESTMORELAND   |
| IN | FLOYD          |
| TX | ARANSAS        |
| KY | TRIMBLE        |
| GA | BARROW         |
| VA | WARREN         |
| GA | PICKENS        |
| VA | FLUVANNA       |
| TN | CLAY           |
| WV | JEFFERSON      |
| KY | CARLISLE       |
| WV | CALHOUN        |
| TN | HANCOCK        |
| IL | BROWN          |
| GA | LANIER         |
| IN | SCOTT          |
| IA | JEFFERSON      |
| IN | SWITZERLAND    |
| NC | POLK           |

|        |          |               |
|--------|----------|---------------|
| Top 5% | CO       | DENVER        |
|        | IA       | HUMBOLDT      |
|        | GA       | CHATTOOGA     |
|        | GA       | HARALSON      |
|        | GA       | BEN HILL      |
|        | GA       | COOK          |
|        | TN       | CANNON        |
|        | KY       | NICHOLAS      |
|        | GA       | CATOOSA       |
|        | GA       | JOHNSON       |
|        | KY       | SPENCER       |
|        | TX       | RAINS         |
|        | NC       | CURRITUCK     |
|        | KY       | HANCOCK       |
|        | GA       | CANDLER       |
|        | GA       | TREUTLEN      |
|        | VA       | ISLE OF WIGHT |
|        | MO       | GENTRY        |
|        | SD       | CLAY          |
|        | NC       | NEW HANOVER   |
| IN     | HOWARD   |               |
| IA     | LOUISA   |               |
| KY     | FRANKLIN |               |



|    |            |
|----|------------|
| MI | LAKE       |
| NE | COLFAX     |
| WI | GREEN LAKE |
| KY | POWELL     |
| WV | MARION     |
| RI | KENT       |
| KY | EDMONSON   |
| TN | MACON      |
| KY | ANDERSON   |
| KY | CAMPBELL   |
| KY | CLINTON    |
| KY | MARTIN     |
| NE | GOSPER     |
| GA | UPSON      |
| GA | LEE        |
| VA | JAMES CITY |
| KY | BOYLE      |
| MI | ARENAC     |
| NC | LEE        |
| GA | GILMER     |
| GA | POLK       |
| VA | LANCASTER  |
| GA | PULASKI    |

|    |            |
|----|------------|
| OK | WASHINGTON |
| IA | MITCHELL   |
| TN | RHEA       |
| MO | RANDOLPH   |
| IL | MOULTRIE   |
| VA | ORANGE     |
| NC | GREENE     |
| NJ | PASSAIC    |
| PA | CAMERON    |
| IN | DECATUR    |
| GA | WALTON     |
| WI | PEPIN      |
| KY | KENTON     |
| MN | WASECA     |
| IA | IDA        |
| TN | CHEATHAM   |
| WV | MARSHALL   |
| MN | RAMSEY     |
| MS | QUITMAN    |
| GA | IRWIN      |
| IA | APPANOOSE  |
| KY | LYON       |
| NE | WASHINGTON |

|    |             |
|----|-------------|
| NE | SARPY       |
| GA | JONES       |
| WV | CABELL      |
| KY | BRACKEN     |
| IN | STARKE      |
| SD | MOODY       |
| GA | MURRAY      |
| IN | MARTIN      |
| IA | ADAMS       |
| IA | PALO ALTO   |
| IA | MAHASKA     |
| KS | WOODSON     |
| GA | MORGAN      |
| IL | CLAY        |
| WV | WETZEL      |
| MN | PIPESTONE   |
| VA | ROANOKE     |
| GA | CALHOUN     |
| NE | STANTON     |
| NY | YATES       |
| NC | SCOTLAND    |
| MI | EMMET       |
| NY | SCHENECTADY |

|         |    |          |
|---------|----|----------|
|         | IL | JERSEY   |
|         | MS | CLAY     |
|         | NC | HERTFORD |
|         | KY | HARRISON |
|         | IN | ADAMS    |
| Top 10% | MO | RAY      |

Table 10: List of counties with highest percent (Top 1%, 5%, 10%) of nursing facilities near major roadways normalized to county area and total road length within the county

| Percentile | State | County Name  |
|------------|-------|--------------|
| Top 1%     | VA    | FAIRFAX CITY |
|            | VA    | NORTON       |
|            | VA    | WINCHESTER   |
|            | VA    | EMPORIA      |
|            | VA    | HOPEWELL     |
|            | VA    | STAUNTON     |
|            | VA    | WAYNESBORO   |
|            | RI    | BRISTOL      |
|            | VA    | HARRISONBURG |
|            | VA    | PETERSBURG   |
|            | VA    | ALEXANDRIA   |
|            | NM    | LOS ALAMOS   |
|            | VA    | DANVILLE     |
|            | NY    | NEW YORK     |
|            | TN    | TROUSDALE    |
|            | TN    | MOORE        |
|            | IN    | UNION        |
|            | VA    | ROANOKE CITY |
|            | VA    | LYNCHBURG    |
|            | KY    | ROBERTSON    |
|            | VA    | ARLINGTON    |

|    |               |
|----|---------------|
| NY | RICHMOND      |
| WV | HANCOCK       |
| VA | PORTSMOUTH    |
| IL | EDWARDS       |
| IL | WABASH        |
| VA | RICHMOND CITY |
| NY | BRONX         |
| GA | CLAY          |
| TX | RAINS         |
| GA | OCONEE        |
| NY | KINGS         |
| GA | STEPHENS      |
| TN | HANCOCK       |
| IL | BROWN         |
| GA | BARROW        |
| VA | WESTMORELAND  |
| KY | TRIMBLE       |
| IN | FAYETTE       |
| KY | CARLISLE      |
| VA | WARREN        |
| VA | FLUVANNA      |
| TN | CLAY          |
| GA | LANIER        |

|    |                |
|----|----------------|
| WV | OHIO           |
| IN | SWITZERLAND    |
| WV | CALHOUN        |
| TX | ROCKWALL       |
| IA | ADAMS          |
| PA | MONTOUR        |
| GA | COOK           |
| NC | CURRITUCK      |
| TN | CANNON         |
| VA | HAMPTON        |
| MO | ST. LOUIS CITY |
| TX | MORRIS         |
| KY | NICHOLAS       |
| GA | CHATTOOGA      |
| NE | GOSPER         |
| GA | CATOOSA        |
| GA | CANDLER        |
| KY | SPENCER        |
| NJ | HUDSON         |
| WI | GREEN LAKE     |
| GA | JOHNSON        |
| CA | SAN FRANCISCO  |
| VA | LANCASTER      |

|        |         |              |
|--------|---------|--------------|
| Top 5% | KY      | HANCOCK      |
|        | NC      | GREENE       |
|        | WV      | JEFFERSON    |
|        | VA      | NEWPORT NEWS |
|        | MI      | LAKE         |
|        | KY      | BOYLE        |
|        | GA      | TREUTLEN     |
|        | KS      | WOODSON      |
|        | IA      | LUCAS        |
|        | KY      | POWELL       |
|        | PA      | CAMERON      |
|        | GA      | LUMPKIN      |
|        | MS      | STONE        |
|        | TN      | MACON        |
|        | GA      | WARREN       |
|        | KY      | EDMONSON     |
|        | KY      | FRANKLIN     |
|        | WI      | PEPIN        |
|        | IA      | HUMBOLDT     |
|        | IA      | WORTH        |
| GA     | IRWIN   |              |
| IL     | KENDALL |              |
| KY     | MARTIN  |              |



|    |          |
|----|----------|
| KY | ANDERSON |
| IN | STARKE   |
| IN | OWEN     |
| KY | CLINTON  |
| GA | PULASKI  |
| MS | QUITMAN  |
| WV | WETZEL   |
| VA | ORANGE   |
| MS | SHARKEY  |
| AR | LEE      |
| GA | POLK     |
| GA | GILMER   |
| GA | WALTON   |
| TN | DECATUR  |
| GA | LEE      |
| GA | MURRAY   |
| VA | NOTTOWAY |
| KY | BRACKEN  |
| IN | SCOTT    |
| TN | CHEATHAM |
| SD | MOODY    |
| IN | PIKE     |
| TN | SCOTT    |

|    |          |
|----|----------|
| NC | HERTFORD |
| GA | CALHOUN  |
| MI | EMMET    |
| NE | STANTON  |
| GA | NEWTON   |
| MO | CLARK    |
| GA | UPSON    |
| TX | ARANSAS  |
| IN | PARKE    |
| ID | PAYETTE  |
| MN | ISANTI   |
| GA | BEN HILL |
| TN | JACKSON  |
| KY | ROWAN    |
| IN | STEUBEN  |
| GA | MORGAN   |
| MO | MORGAN   |
| KY | FULTON   |
| VA | NORFOLK  |
| NE | BOYD     |
| MO | CLINTON  |
| MO | LEWIS    |
| KY | MEADE    |

|    |                      |
|----|----------------------|
| LA | ST. JOHN THE BAPTIST |
| IA | JEFFERSON            |
| MO | PERRY                |
| IA | GREENE               |
| RI | KENT                 |
| MD | SOMERSET             |
| NC | WARREN               |
| TN | WHITE                |
| WV | LEWIS                |
| NE | VALLEY               |
| IL | CLAY                 |
| VA | BUCHANAN             |
| TN | SMITH                |
| KY | CAMPBELL             |
| VA | CULPEPER             |
| VA | JAMES CITY           |
| DC | DISTRICT OF COLUMBIA |
| GA | MARION               |
| MO | DEKALB               |
| KY | FLEMING              |
| MI | MANISTEE             |
| GA | GREENE               |
| AR | CLAY                 |

|         |    |           |
|---------|----|-----------|
|         | GA | BRANTLEY  |
|         | LA | ST. JAMES |
|         | NJ | UNION     |
|         | OK | MARSHALL  |
|         | KY | LARUE     |
| Top 10% | IN | FLOYD     |
